# Supplementary material for: The Effect of Cyclosporin A on Aspergillus niger and the Possible Mechanisms Involved
Source: MDPI journal article supplement (doi:10.3390/foods12030567), 2023-01-28
Supplement: s1 [file s1]

# The effect of cyclosporin A on *Aspergillus niger* and the possible mechanisms involved

Fengming Li <sup>1,2,†</sup>, Zhencheng Lv <sup>1,†</sup>, Zhijuan Zhong <sup>1</sup>, Lutian Mao <sup>1</sup>, Lee Suan Chua <sup>3</sup>,  
Liangxiong Xu <sup>1,\*</sup> and Riming Huang <sup>2,\*</sup>

<sup>1</sup> School of Life Sciences, Huizhou University, Huizhou 516001, China

<sup>2</sup> College of Food Sciences, South China Agricultural University, Guangzhou 510642, China

<sup>3</sup> Department of Bioprocess and Polymer Engineering, Faculty of Chemical and Energy Engineering, Universiti Teknologi Malaysia, UTM Skudai, Johor Bahru 81310, Malaysia

\* Correspondence: xlx048@hzu.edu.cn (L.X.); huangriming@scau.edu.cn (R.H.)

† These authors contributed equally to this work.

# Supplementary Materials

## Contents:

|                                                                         |    |
|-------------------------------------------------------------------------|----|
| <b>Table S1.</b> Primers used for real-time PCR. ....                   | 3  |
| <b>Table S2.</b> Representative DEGs in CsA treatment and control. .... | 5  |
| Structural identification of cyclosporin A–C. ....                      | 7  |
| <b>Figure S1.</b> $^1\text{H}$ NMR of cyclosporin A.....                | 9  |
| <b>Figure S2.</b> $^{13}\text{C}$ NMR of cyclosporin A.....             | 9  |
| <b>Figure S3.</b> (+) ESI-MS of cyclosporin A.....                      | 10 |
| <b>Figure S4.</b> (–) ESI-MS of cyclosporin A.....                      | 10 |
| <b>Figure S5.</b> $^1\text{H}$ NMR of cyclosporin B.....                | 11 |
| <b>Figure S6.</b> $^{13}\text{C}$ NMR of cyclosporin B.....             | 11 |
| <b>Figure S7.</b> (+) ESI-MS of cyclosporin B.....                      | 12 |
| <b>Figure S8.</b> (–) ESI-MS of cyclosporin B.....                      | 12 |
| <b>Figure S9.</b> $^1\text{H}$ NMR of cyclosporin C.....                | 13 |
| <b>Figure S10.</b> $^{13}\text{C}$ NMR of cyclosporin C.....            | 13 |
| <b>Figure S11.</b> (+) ESI-MS of cyclosporin C.....                     | 14 |
| <b>Figure S12.</b> (–) ESI-MS of cyclosporin C.....                     | 14 |

**Table S1.** Primers used for real-time PCR.

| Gene name        | Primers (5'-3')                                             | Description                     |
|------------------|-------------------------------------------------------------|---------------------------------|
| Actin            | F: GGTTTCCTCAAGGTCGGATATG<br>R: CCCATCTCTTCACGATACCATTC     | House-keeping gene              |
| ATCC64974_63830  | F: TCCTTGCTGACAACGGCGATGC<br>R: TTGGCGTAGGTGACGGTGAGGT      | Pectate lyase A                 |
| ATCC64974_82630  | F: CGCCGTGAACAACCTCTTCCACAA<br>R: GGTGAGCCGCAGCAATGGTCTT    | Pectin lyase B                  |
| ATCC64974_86460  | F: GTAGCCCTTGTCGGAACGCAGAT<br>R: CACACGGACGCATCGCCAAAGA     | Pectinesterase                  |
| ATCC64974_76140  | F: CCTCCTTCCCTTGACGCTCTTCCT<br>R: CTTCAACAACAACCGACCGCCATG  | Exopolygalacturonase B          |
| ATCC64974_14230  | F: TCTCCGACTCCACTGTCAGCAACT<br>R: GAGCCGTCACCGCAGAGAATGTAG  | Endopolygalacturonase I         |
| ATCC64974_11770  | F: GACAGCGACGACGGAACCTACAAG<br>R: AGTCTCAACGGTGATGGTGGCAGA  | Endo-1,4- $\beta$ -xylanase     |
| ATCC64974_83160  | F: GCACTTTCACCTACCGCACCTCTC<br>R: GTACACTTGGAACCGCCTCGAACAA | $\alpha$ -L-arabinofuranosidase |
| ATCC64974_67930  | F: ACCGAGTGGCTGAAGACCAACAAC<br>R: GTAGCAGCAGCAACGGAGACAGAG  | Cellulase A                     |
| ATCC64974_61750  | F: AACGGTGGTGCTGGTGTCTACAAC<br>R: TCGTCGGACTCGTAGTAGCCATCG  | Nucleolar GTP-binding protein 1 |
| ATCC64974_79520  | F: TGGCGAGGAGGGCGAGAAGATT<br>R: AGCCTCAGGAGCGGTCTCATCAA     | Nucleolar GTP-binding protein 2 |
| ATCC64974_16060  | F: CAGAAGCAGCAGAAGCGGACCAA<br>R: ACGGGAACACGAGCCTCCTTGA     | ATP-dependent RNA helicase has1 |
| ATCC64974_100390 | F: GATGCGGACGGAACGGAGAAGAAG<br>R: GTGCCCTTGCCCTGAACTTGAGA   | ATP-dependent RNA helicase dbp4 |

| Gene name       | Primers (5'-3')                                            | Description                            |
|-----------------|------------------------------------------------------------|----------------------------------------|
| ATCC64974_76870 | F: GCGATGAGGATGAGTCTGGCGATG<br>R: GTCACCGAACTGGCTGAAGTAGGC | RNA recognition motif protein          |
| ATCC64974_32600 | F: CCTTGCAGATGCGAGTTCGACCAA<br>R: CCTATGGACCGAGCCGTTGATGTG | tRNA dimethylallyltransferase          |
| ATCC64974_19840 | F: GCCACACAGCATTCATCAGCAAGC<br>R: CCGTCAGATTCCAGCGTGAAGCAT | tRNA methyltransferase                 |
| ATCC64974_76250 | F: CGAAGCACGCAAGCACCATGAAG<br>R: GCGGCTCGACGATCCTTGATTCTT  | rRNA-processing protein                |
| ATCC64974_24320 | F: TTCTCAACCAGCTCCTGACCACCT<br>R: CACCAACTTCTTGCGACGCTCCT  | Ribosome biogenesis regulatory protein |
| ATCC64974_48330 | F: TCGTCGTCGCAGGCTGGAAAGA<br>R: GCCATCACTCTCATCGCCGTCATC   | rRNA-processing protein                |
| ATCC64974_66910 | F: TGCTGGGTCTGATGACGATGGGAT<br>R: ATGGTGCTCTCCTCGGCGATCA   | rRNA-processing protein                |

Table S2. Representative DEGs in different comparisons between CsA treatment and control.

| Gene name        | Log2<br>foldchange | Name             | Description                                     |
|------------------|--------------------|------------------|-------------------------------------------------|
| ATCC64974_75020  | 2.148092932        | An03g05330       | $\beta$ -glucosidase                            |
| ATCC64974_64540  | 2.042347189        | An17g00520       | $\beta$ -glucosidase I                          |
| ATCC64974_49560  | 2.247971421        | eglB             | Endo- $\beta$ -1,4-glucanase B                  |
| ATCC64974_67930  | 2.403118414        | An16g06800       | Cellulase                                       |
| ATCC64974_83150  | 3.045727063        | xlnC             | Endo-1,4- $\beta$ -xylanase C                   |
| ATCC64974_83160  | 2.414639663        | axhA             | $\alpha$ -L-arabinofuranosidase                 |
| ATCC64974_11770  | 3.222379082        | An01g14600       | Endo-1,4- $\beta$ -xylanase                     |
| ATCC64974_104980 | 2.121349655        | An08g01710       | $\alpha$ -N-arabinofuranosidase C               |
| ATCC64974_90170  | 2.537519625        | pgxA             | Exopolygalacturonase A                          |
| ATCC64974_76140  | 2.762757751        | pgxB             | Exopolygalacturonase B                          |
| ATCC64974_14230  | 2.583143671        | pga1             | Endopolygalacturonase I                         |
| ATCC64974_87310  | 2.383571245        | An11g00390       | Rhamnogalacturonate<br>lyase B                  |
| ATCC64974_63830  | 2.049605059        | plyA             | Pectate lyase A                                 |
| ATCC64974_82630  | 3.375258584        | pelB             | Pectin lyase B                                  |
| ATCC64974_27210  | 2.035303708        | pelF             | Pectin lyase F                                  |
| ATCC64974_86460  | 2.774728183        | CAN33_7630       | Pectinesterase                                  |
| ATCC64974_26570  | 1.75310009         | CAN33_0014840    | Chitinase                                       |
| ATCC64974_62990  | 1.207602158        | P36362           | Chitinase                                       |
| ATCC64974_28340  | -2.3651205         | CADANGAP00012024 | RNA Polymerase C                                |
| ATCC64974_107890 | -2.133346352       | An18g04850       | DNA-directed RNA<br>polymerase subunit          |
| ATCC64974_100390 | -2.228547666       | An08g07790       | ATP-dependent RNA<br>helicase dbp4              |
| ATCC64974_16060  | -2.04063327        | An01g09040       | ATP-dependent RNA<br>helicase has1              |
| ATCC64974_31800  | -2.381563875       | An15g01160       | ATP-binding RNA helicase<br>Dhr1p               |
| ATCC64974_57280  | -2.040507378       | An02g06750       | ATP-dependent RNA<br>helicase dbp8              |
| ATCC64974_19840  | -2.358190465       | TRM82            | tRNA methyltransferase<br>non-catalytic subunit |
| ATCC64974_15590  | -2.235025771       | An01g09640       | SAM-binding<br>methyltransferase                |

| Gene name        | Log2<br>foldchange | Name       | Description                                              |
|------------------|--------------------|------------|----------------------------------------------------------|
| ATCC64974_23420  | -2.302264715       | An01g00070 | SAM-binding<br>methyltransferase                         |
| ATCC64974_61670  | -2.240805505       | An02g03410 | Methyltransferase                                        |
| ATCC64974_66910  | -2.186110032       | An16g08220 | 18S rRNA biogenesis<br>protein RCL1                      |
| ATCC64974_38490  | -2.058772523       | An05g00960 | rRNA-processing protein                                  |
| ATCC64974_24320  | -2.03698352        | An13g01010 | Ribosome biogenesis<br>regulatory protein                |
| ATCC64974_78040  | -2.148006262       | YTM1       | Ribosome biogenesis<br>protein                           |
| ATCC64974_61750  | -2.013841311       | An02g03520 | Nucleolar GTP-binding<br>protein 1                       |
| ATCC64974_79520  | -2.180820626       | CAN33_5400 | Nucleolar GTP-binding<br>protein 2                       |
| ATCC64974_39330  | -2.061517517       | An12g00450 | Ribosomal RNA-<br>processing protein 7                   |
| ATCC64974_48330  | -2.095671872       | CAN33_2620 | rRNA-processing protein<br>efg1                          |
| ATCC64974_76250  | -2.03094042        | An03g06850 | rRNA-processing protein                                  |
| ATCC64974_32160  | -2.545837203       | An15g00680 | 60S ribosomal subunit<br>assembly/export protein<br>loc1 |
| ATCC64974_103830 | -2.420533415       | An08g03290 | Nucleolar protein Nop52                                  |
| ATCC64974_3200   | -2.275908849       | An14g03620 | Nucleolar protein 9                                      |
| ATCC64974_95370  | -2.260509495       | An11g10760 | RNA recognition motif<br>protein NRS1                    |
| ATCC64974_94820  | -2.093839892       | An11g10020 | RNA recognition motif<br>protein                         |
| ATCC64974_66650  | -2.1447343         | An16g08640 | RNA recognition motif<br>protein                         |
| ATCC64974_76870  | -2.007029001       | CAN33_4095 | RNA recognition motif<br>protein gar2                    |
| ATCC64974_76770  | -2.266362682       | CAN33_4035 | RNA recognition motif<br>protein                         |

### Structural identification of cyclosporin A–C.

Cyclosporine A (CsA): white amorphous solid;  $^1\text{H}$  NMR ( $\text{CDCl}_3$ , 400 MHz): 1-MeBmt:  $\delta$  5.44 (d,  $J$  = 5.8 Hz, 2H, H-2), 5.33 (m, 1H, H-6, 7), 3.80 (m, 1H, H-3), 3.49 (s, 3H,  $\text{NCH}_3$ ), 2.37 (m, 1H, H-5), 1.61 (m, 1H, H-4, 5), 1.61 (m, 3H, H-8), 0.70 (d,  $J$  = 5.8 Hz, 3H, H-9); 2-Abu:  $\delta$  7.92 (d,  $J$  = 8.9 Hz, 1H, NH), 5.01 (m, 1H, H-2), 1.72 (m, 2H, H-3), 0.89 (m, 3H, H-4); 3-Sar:  $\delta$  4.72 (d,  $J$  = 14.0 Hz, 1H, H-2), 3.37 (s, 3H,  $\text{NCH}_3$ ), 3.17 (s, 1H, H-2); 4-MeLeu:  $\delta$  5.30 (m, 1H, H-2), 3.10 (s, 3H,  $\text{NCH}_3$ ), 2.22 (m, 1H, H-3), 1.61 (m, 1H, H-3), 1.43 (m, 1H, H-4), 1.02 (m, 3H, H-5), 0.83 (m, 3H, H-6); 5-Val:  $\delta$  7.46 (d,  $J$  = 8.4 Hz, 1H, NH), 4.65 (m, 1H, H-2), 2.40 (m, 1H, H-3), 1.04 (d,  $J$  = 9.6 Hz, 3H, H-4), 0.83 (m, 3H, H-5); 6-MeLeu:  $\delta$  4.98 (m, 1H, H-2), 3.23 (s, 3H,  $\text{NCH}_3$ ), 2.22 (m, 2H, H-3), 1.61 (m, 1H, H-4), 0.83 (m, 3H, H-5, 6); 7-Ala:  $\delta$  7.68 (d,  $J$  = 7.4 Hz, 1H, NH), 4.50 (m, 1H, H-2), 1.34 (s, 3H, H-3); 8-Ala:  $\delta$  7.15 (d,  $J$  = 7.6 Hz, 1H, NH), 4.81 (m, 1H, H-2), 1.24 (s, 3H, H-3); 9-MeLeu:  $\delta$  5.68 (d,  $J$  = 4.1 Hz, 1H, H-2), 3.08 (s, 3H,  $\text{NCH}_3$ ), 1.94 (m, 2H, H-3), 1.61 (m, 1H, H-4), 0.83 (m, 3H, H-5, 6); 10-MeLeu:  $\delta$  5.07 (m, 1H, H-2), 2.68 (s, 3H,  $\text{NCH}_3$ ), 1.94 (m, 2H, H-3), 1.61 (m, 1H, H-4), 0.83 (m, 3H, H-5, 6); 11-MeVal:  $\delta$  5.12 (d,  $J$  = 11.0 Hz, 1H, H-2), 3.70 (s, 3H,  $\text{NCH}_3$ ), 1.94 (m, 2H, H-3), 0.83 (m, 3H, H-4, 5).  $^{13}\text{C}$  NMR ( $\text{CDCl}_3$ , 100 MHz): 1-MeBmt:  $\delta$  171.6 (C-1), 129.7 (C-6), 126.3 (C-7), 74.8 (C-3), 58.8 (C-2), 36.0 (C-4, N-C), 35.7 (C-5), 18 (C-8), 16.8 (C-9); 2-Abu:  $\delta$  173.6 (C-1), 48.9 (C-2), 25.4 (C-3), 10.0 (C-4); 3-Sar:  $\delta$  171.2 (C-1), 50.4 (C-2), 34.0 (N-C); 4-MeLeu:  $\delta$  170.5 (C-1), 55.5 (C-2), 37.4 (C-3), 31.6 (N-C), 24.9 (C-4), 21.2 (C-6), 18.8 (C-5); 5-Val:  $\delta$  173.8 (C-1), 48.3 (C-2), 23.8 (C-3), 20.3 (C-5), 18.5 (C-4); 6-MeLeu:  $\delta$  170.4 (C-1), 55.4 (C-2), 39.1 (C-3), 31.4 (N-C), 25.1 (C-4), 23.9 (C-5), 21.9 (C-6); 7-Ala:  $\delta$  171.2 (C-1), 48.7 (C-2), 16.1 (C-3); 8-Ala:  $\delta$  173.7 (C-1), 45.2 (C-2), 18.2 (C-3); 9-MeLeu:  $\delta$  170.1 (C-1), 55.4 (C-2), 39.5 (C-3), 31.2 (N-C), 24.6 (C-4), 23.9 (C-5), 21.9 (C-6); 10-MeLeu:  $\delta$  170.1 (C-1), 57.6 (C-2), 40.7 (C-3), 29.9 (N-C), 24.7 (C-4), 23.9 (C-5), 23.4 (C-6); 11-MeVal:  $\delta$  173.5 (C-1), 58.0 (C-2), 29.8 (N-C), 29.1 (C-3), 23.5 (C-5), 19.9 (C-4). (+)-ESIMS  $m/z$  1224  $[\text{M} + \text{Na}]^+$ ; (–)-ESIMS  $m/z$  1200  $[\text{M} - \text{H}]^-$ . Based on these results, the compound was identified as cyclosporine A [16].

Cyclosporine B (CsB): white amorphous solid;  $^1\text{H}$  NMR ( $\text{CDCl}_3$ , 400 MHz): 1-MeBmt:  $\delta$  5.41 (m, 1H, H-2), 5.34 (m, 1H, H-6, 7), 3.78 (m, 1H, H-3), 3.48 (s, 3H,  $\text{NCH}_3$ ), 2.37 (m, 1H, H-5), 1.61 (m, 1H, H-4, 5), 1.61 (m, 3H, H-8), 0.70 (d,  $J$  = 5.8 Hz, 3H, H-9); 2-Abu:  $\delta$  8.00 (d,  $J$  = 10.2 Hz, 1H, NH), 5.08 (m, 1H, H-2), 1.02 (m, 3H, H-3); 3-Sar:  $\delta$  4.73 (m, 1H, H-2), 3.38 (s, 3H,  $\text{NCH}_3$ ); 4-MeLeu:  $\delta$  5.34 (m, 1H, H-2), 3.10 (s, 1H,  $\text{NCH}_3$ ), 2.22 (m, 1H, H-3), 1.61 (m, 1H, H-3), 1.43 (m, 1H, H-4), 1.02 (m, 3H, H-5), 0.83 (m, 3H, H-6); 5-Val:  $\delta$  7.39 (d,  $J$  = 8.0 Hz, 1H, NH), 4.67 (m, 1H, H-2), 2.40 (m, 1H, H-3), 1.04 (d,  $J$  = 9.6 Hz, 3H, H-4), 1.02 (m, 3H, H-5); 6-MeLeu:  $\delta$  4.99 (m, 1H, H-2), 3.23 (s, 3H,  $\text{NCH}_3$ ), 2.22 (m, 2H, H-3), 1.61 (m, 1H, H-4), 1.02 (m, 3H, H-5), 0.83 (m, 3H, H-6); 7-Ala:  $\delta$  7.68 (d,  $J$  = 7.4 Hz, 1H, NH), 4.51 (m, 1H, H-2), 1.34 (s, 3H, H-3); 8-Ala:  $\delta$  7.14 (d,  $J$  = 8.0 Hz, 1H, NH), 4.82 (m, 1H, H-2), 1.24 (s, 3H, H-3); 9-MeLeu:  $\delta$  5.68 (d,  $J$  = 6.9 Hz, 1H, H-2), 3.09 (s, 3H,  $\text{NCH}_3$ ), 2.22 (m, 2H, H-3), 1.61 (m, 1H, H-4), 1.02 (m, 3H, H-5), 0.83 (m, 3H, H-6); 10-MeLeu:  $\delta$  5.23 (m, 1H, H-2), 2.68 (s, 3H,  $\text{NCH}_3$ ), 2.22 (m, 2H, H-3), 1.61 (m, 1H, H-4), 1.02 (m, 3H, H-5), 0.83 (m, 3H, H-6); 11-MeVal:  $\delta$  5.13 (m, 1H, H-2), 2.71 (s, 3H,  $\text{NCH}_3$ ), 2.22 (m, 2H, H-3), 1.02 (m, 3H, H-4), 0.83 (m, 3H, H-5).  $^{13}\text{C}$  NMR ( $\text{CDCl}_3$ , 100 MHz): 1-MeBmt:  $\delta$  171.6 (C-1), 129.6 (C-6), 129.4 (C-7), 74.8 (C-3), 58.6 (C-

2), 36.2 (C-4), 36.1 (N-C), 35.8 (C-5), 18.0 (C-8), 16.6 (C-9); 2-*Abu*:  $\delta$  173.5 (C-1), 43.1 (C-2), 17.8 (C-3); 3-*Sar*:  $\delta$  171.6 (C-1), 50.4 (C-2), 33.9 (N-C); 4-*MeLeu*:  $\delta$  171.0 (C-1), 55.6 (C-2), 37.4 (C-3), 31.6 (N-C), 24.8 (C-4), 22.2 (C-6), 18.9 (C-5); 5-*Val*:  $\delta$  174.0 (C-1), 48.4 (C-2), 23.8 (C-3), 20.2 (C-5), 18.7 (C-4); 6-*MeLeu*:  $\delta$  170.1 (C-1), 55.4 (C-2), 39.1 (C-3), 31.3 (N-C), 25 (C-4), 23.9 (C-5), 21.9 (C-6); 7-*Ala*:  $\delta$  171.3 (C-1), 48.8 (C-2), 16.2 (C-3); 8-*Ala*:  $\delta$  173.6 (C-1), 45.3 (C-2), 18.3 (C-3); 9-*MeLeu*:  $\delta$  170.1 (C-1), 55.3 (C-2), 39.4 (C-3), 31.3 (N-C), 24.7 (C-4), 23.8 (C-5), 22.1 (C-6); 10-*MeLeu*:  $\delta$  169.9 (C-1), 57.6 (C-2), 40.8 (C-3), 29.9 (N-C), 25.5 (C-4), 23.8 (C-5), 23.3 (C-6); 11-*MeVal*:  $\delta$  173.5 (C-1), 58.0 (C-2), 29.8 (N-C), 29.0 (C-3), 23.5 (C-5), 19.7 (C-4). (+)-ESIMS  $m/z$  1210  $[M + Na]^+$ ; (–)-ESIMS  $m/z$  1186  $[M - H]^-$ . Based on these results, the compound was identified as cyclosporine B [17].

Cyclosporine C (CsC): white amorphous solid;  $^1H$  NMR ( $CDCl_3$ , 400 MHz): 1-*MeBmt*:  $\delta$  5.33 (m, 1H, H-2, 6, 7), 3.90 (m, 1H, H-3), 3.48 (s, 3H,  $NCH_3$ ), 2.37 (m, 1H, H-5), 1.61 (m, 1H, H-4, 5), 1.61 (m, 3H, H-8), 0.70 (d,  $J = 5.8$  Hz, 3H, H-9); 2-*Abu*:  $\delta$  8.20 (d,  $J = 10.1$  Hz, 1H, NH), 5.10 (m, 1H, H-2), 4.06 (m, 1H, H-3); 3-*Sar*:  $\delta$  4.74 (m, 1H, H-2), 3.33 (s, 3H,  $NCH_3$ ); 4-*MeLeu*:  $\delta$  5.10 (m, 1H, H-2), 3.10 (s, 3H,  $NCH_3$ ), 2.22 (m, 1H, H-3), 1.61 (m, 1H, H-3), 1.43 (m, 1H, H-4), 1.02 (m, 3H, H-5), 0.83 (m, 3H, H-6); 5-*Val*:  $\delta$  7.21 (d,  $J = 7.1$  Hz, 1H, NH), 4.74 (m, 1H, H-2), 2.40 (m, 1H, H-3), 1.04 (d,  $J = 9.6$  Hz, 3H, H-4), 0.83 (m, 3H, H-5); 6-*MeLeu*:  $\delta$  4.87 (m, 1H, H-2), 3.17 (s, 3H,  $NCH_3$ ), 2.22 (m, 2H, H-3), 1.61 (m, 1H, H-4), 1.02 (m, 3H, H-5), 0.83 (m, 3H, H-6); 7-*Ala*:  $\delta$  8.02 (d,  $J = 7.1$  Hz, 1H, NH), 4.41 (m, 1H, H-2), 1.34 (s, 3H, H-3); 8-*Ala*:  $\delta$  7.11 (d,  $J = 9.5$  Hz, 1H, NH), 4.74 (m, 1H, H-2), 1.24 (s, 3H, H-3); 9-*MeLeu*:  $\delta$  5.65 (d,  $J = 7.6$  Hz, 1H, H-2), 3.03 (s, 3H,  $NCH_3$ ), 2.22 (m, 2H, H-3), 1.61 (m, 1H, H-4), 1.02 (m, 3H, H-5), 0.83 (m, 3H, H-6); 10-*MeLeu*:  $\delta$  5.10 (m, 1H, H-2), 2.66 (s, 3H,  $NCH_3$ ), 2.22 (m, 2H, H-3), 1.61 (m, 1H, H-4), 1.02 (m, 3H, H-5), 0.83 (m, 3H, H-6); 11-*MeVal*:  $\delta$  5.22 (m, 1H, H-2), 2.71 (s, 3H,  $NCH_3$ ), 2.22 (m, 2H, H-3), 1.02 (m, 3H, H-4), 0.83 (m, 3H, H-5).  $^{13}C$  NMR ( $CDCl_3$ , 100 MHz): 1-*MeBmt*:  $\delta$  171.4 (C-1), 126.5 (C-7), 129.4 (C-6), 74.3 (C-3), 58.8 (C-2), 35.9 (C-4), 35.3 (N-C), 35.0 (C-5), 17.9 (C-8), 16.5 (C-9); 2-*Abu*:  $\delta$  173.2 (C-1), 67.3 (C-3), 50.0 (C-2), 28.9 (C-4); 3-*Sar*:  $\delta$  171.1 (C-1), 51.5 (C-2), 33.5 (N-C); 4-*MeLeu*:  $\delta$  170.9 (C-1), 55.4 (C-2), 37.5 (C-3), 31.8 (N-C), 24.9 (C-4), 21.4 (C-6), 18.9 (C-5); 5-*Val*:  $\delta$  173.9 (C-1), 48.2 (C-2), 23.7 (C-3), 20.1 (C-5), 18.7 (C-4); 6-*MeLeu*:  $\delta$  170.6 (C-1), 54.6 (C-2), 39.2 (C-3), 31.4 (N-C), 25.1 (C-4), 23.9 (C-5), 21.7 (C-6); 7-*Ala*:  $\delta$  170.9 (C-1), 48.9 (C-2), 16.3 (C-3); 8-*Ala*:  $\delta$  173.5 (C-1), 45.3 (C-2), 18.1 (C-3); 9-*MeLeu*:  $\delta$  170.0 (C-1), 54.6 (C-2), 39.2 (C-3), 31.2 (N-C), 24.7 (C-4), 23.7 (C-5), 21.7 (C-6); 10-*MeLeu*:  $\delta$  170.2 (C-1), 57.3 (C-2), 40.8 (C-3), 29.9 (N-C), 24.7 (C-4), 23.7 (C-5), 23.2 (C-6); 11-*MeVal*:  $\delta$  173.2 (C-1), 58.1 (C-2), 29.9 (N-C), 29.8 (C-3), 23.4 (C-5), 19.1 (C-4). (+)-ESIMS  $m/z$  1240  $[M + Na]^+$ ; (–)-ESIMS  $m/z$  1216  $[M - H]^-$ , 1252  $[M + Cl]^-$ . Based on these results, the compound was identified as cyclosporine C [18].



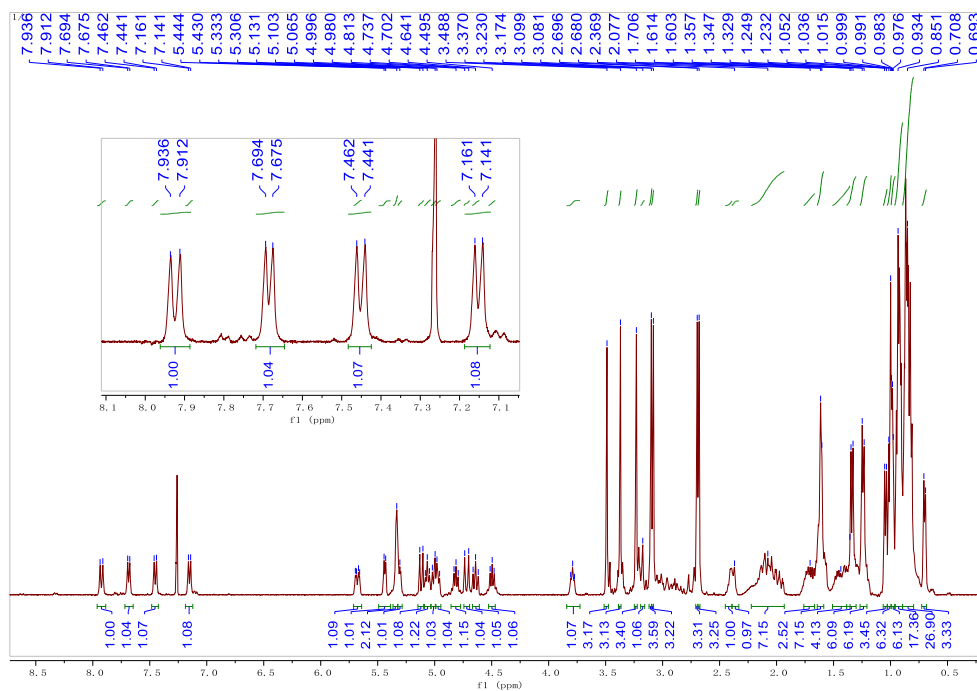

**Figure S1.  $^1\text{H}$  NMR of cyclosporin A (CsA).**

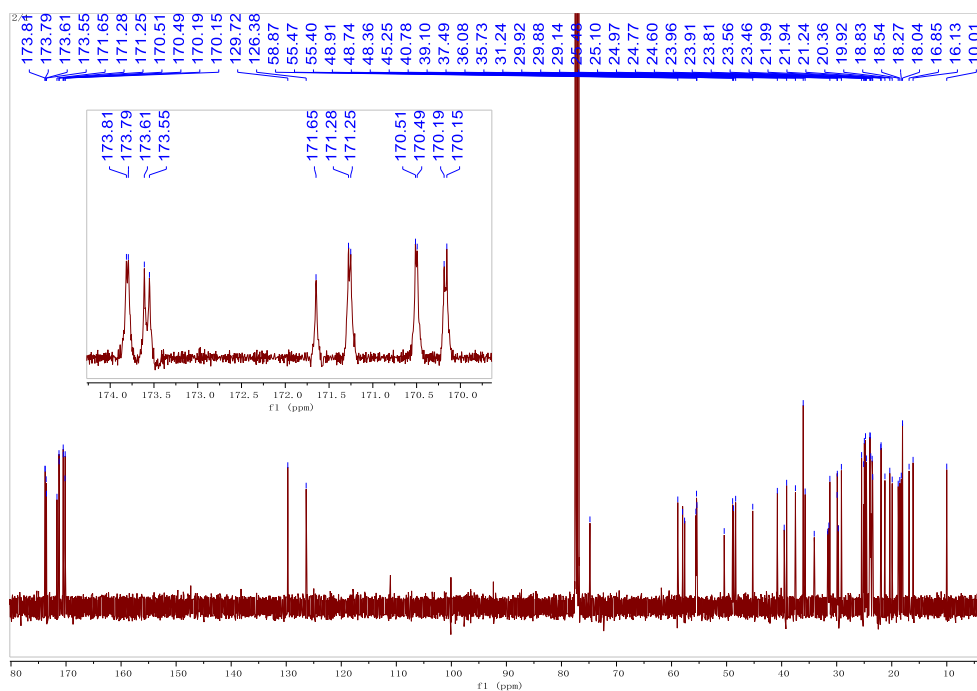

**Figure S2.  $^{13}\text{C}$  NMR of cyclosporin A (CsA).**

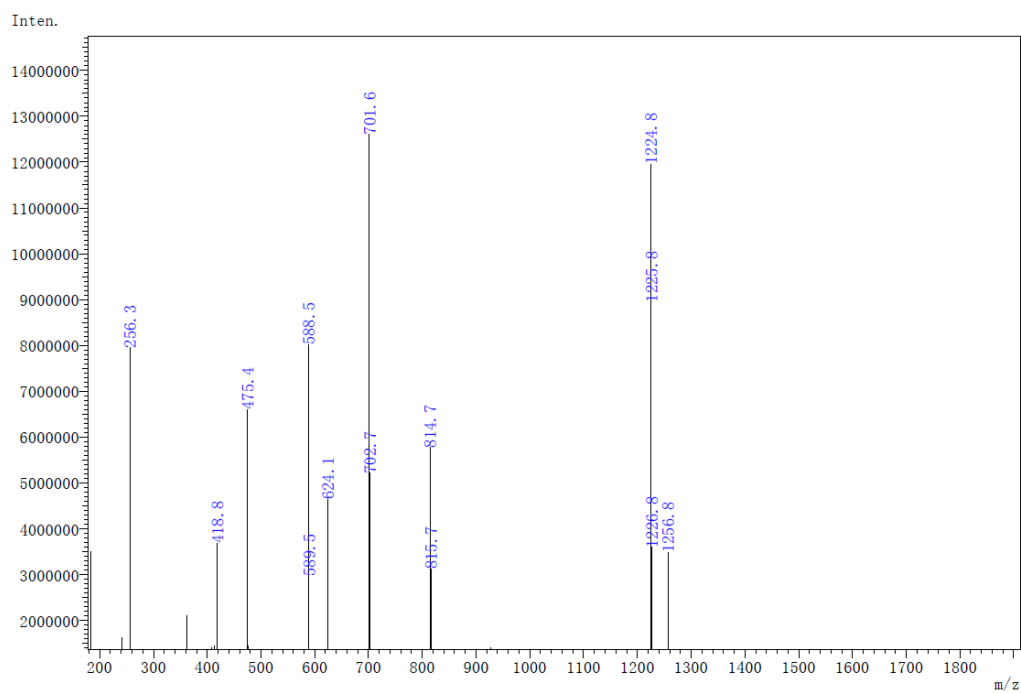

**Figure S3.** (+) ESI-MS of cyclosporin A (CsA).

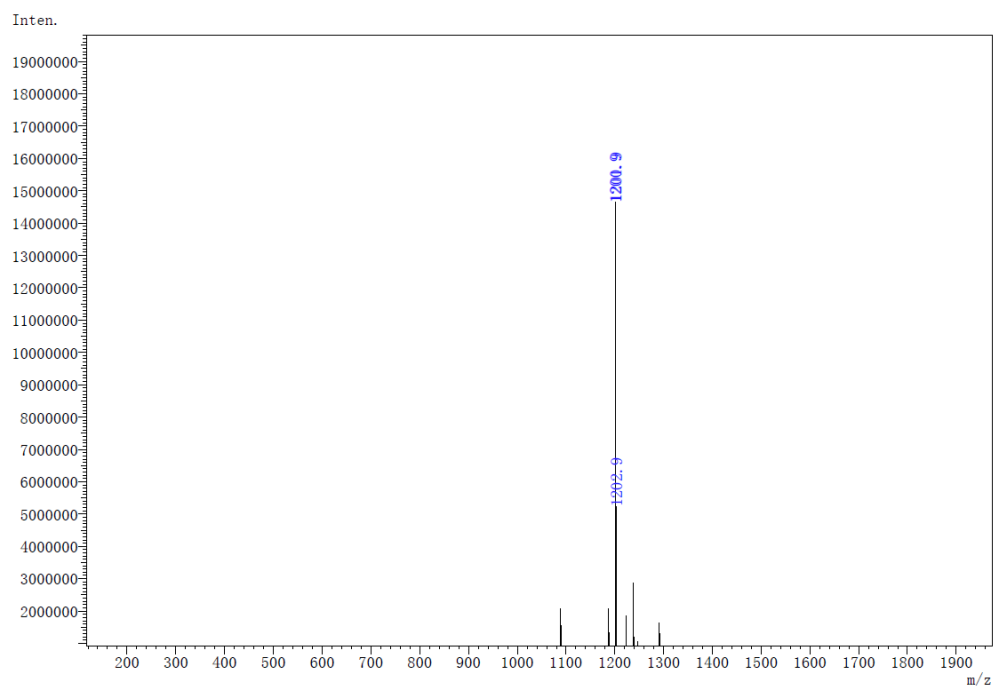

**Figure S4.** (-) ESI-MS of cyclosporin A (CsA).

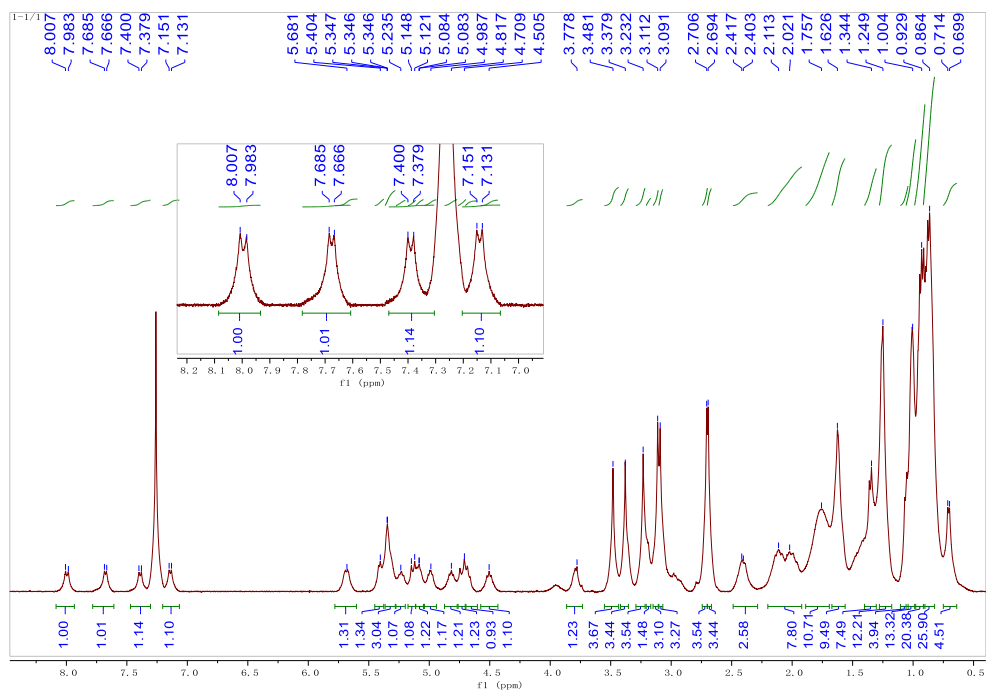

**Figure S5.**  $^1\text{H}$  NMR of cyclosporin A (CsB).

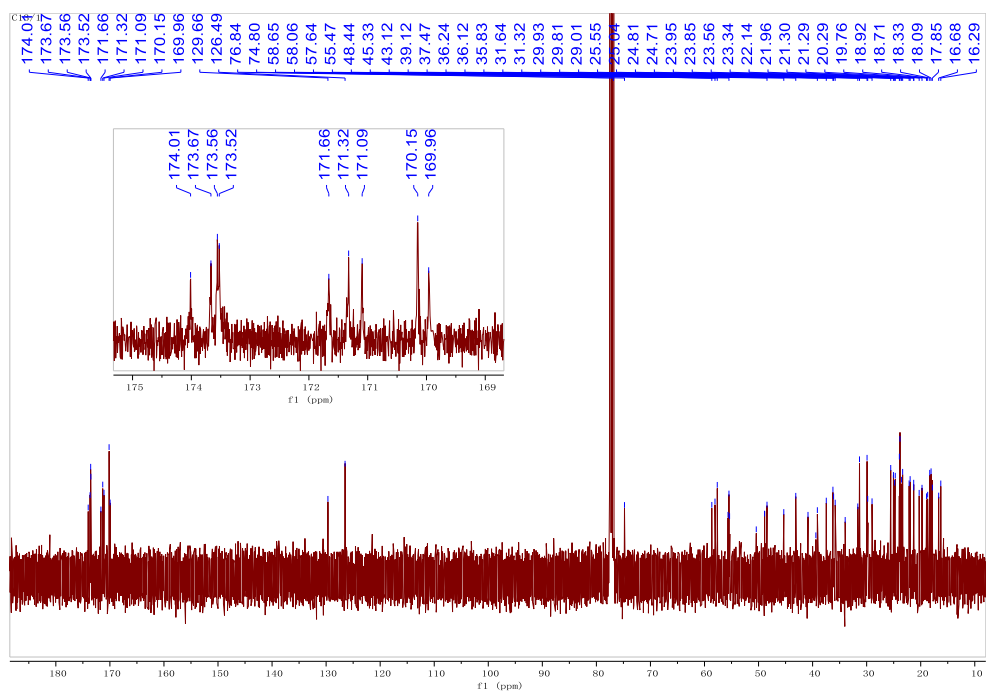

**Figure S6.**  $^{13}\text{C}$  NMR of cyclosporin A (CsB).

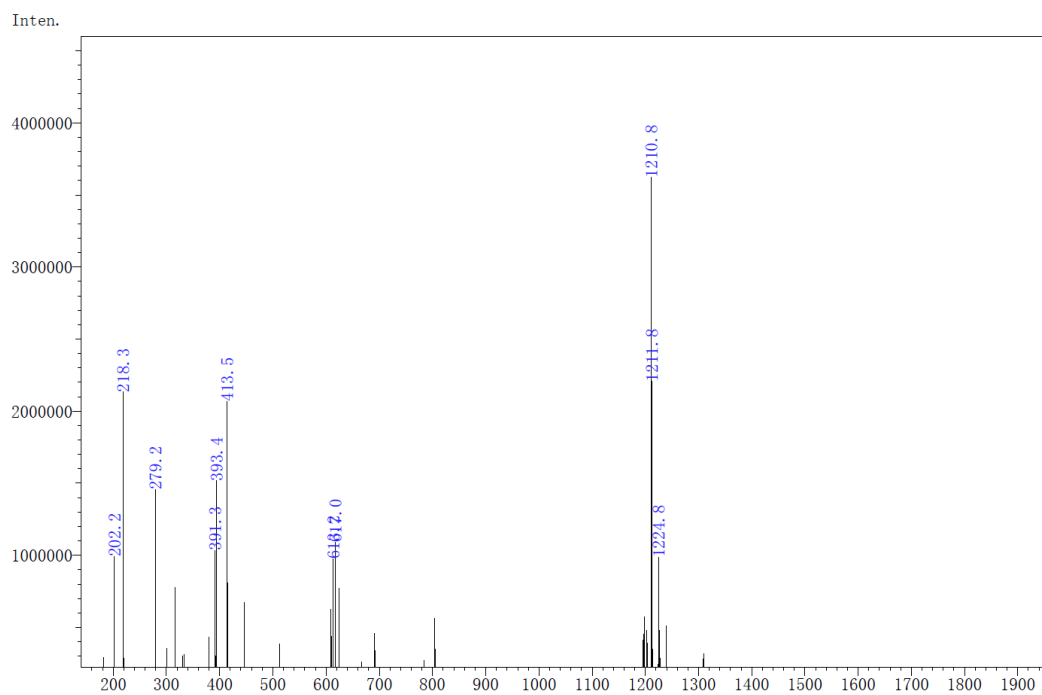

**Figure S7. (+) ESI-MS of cyclosporin A (CsB).**

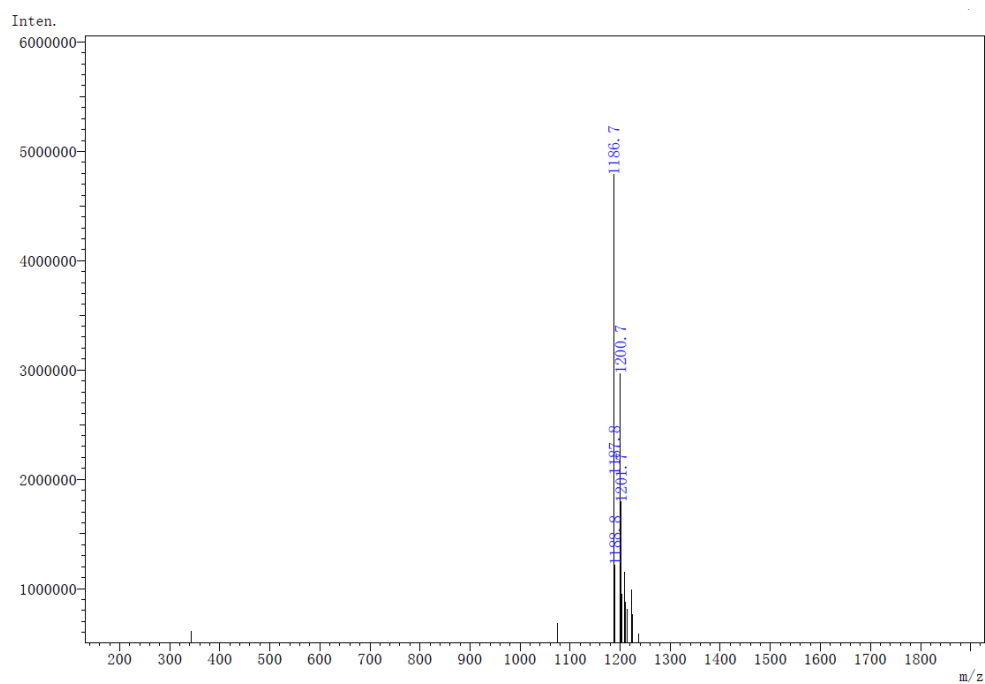

**Figure S8. (-) ESI-MS of cyclosporin A (CsB).**

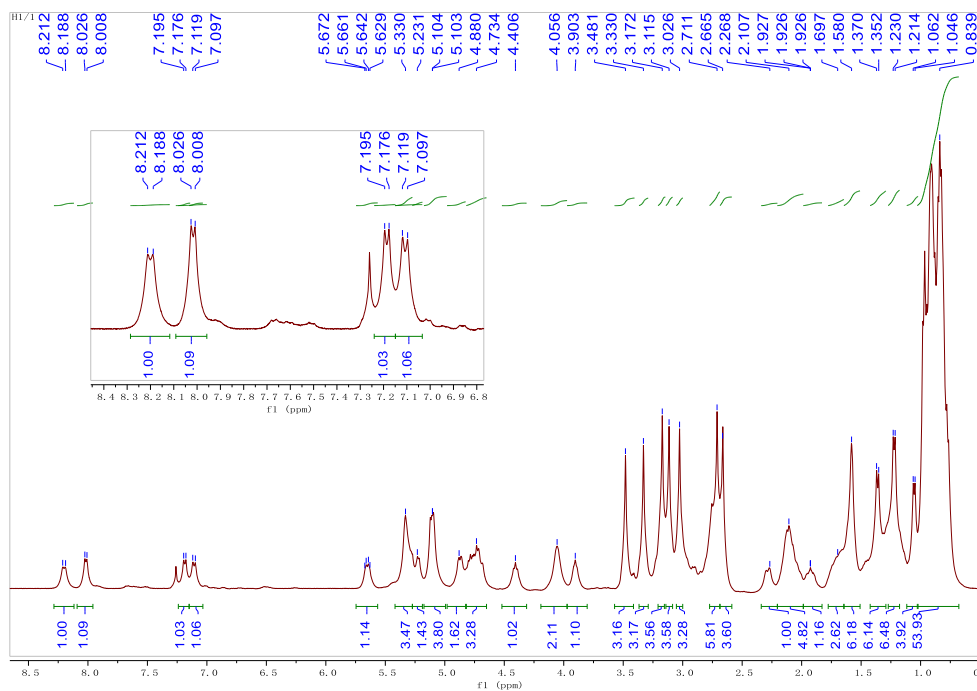

**Figure S9.** <sup>1</sup>H NMR of cyclosporin A (CsC).

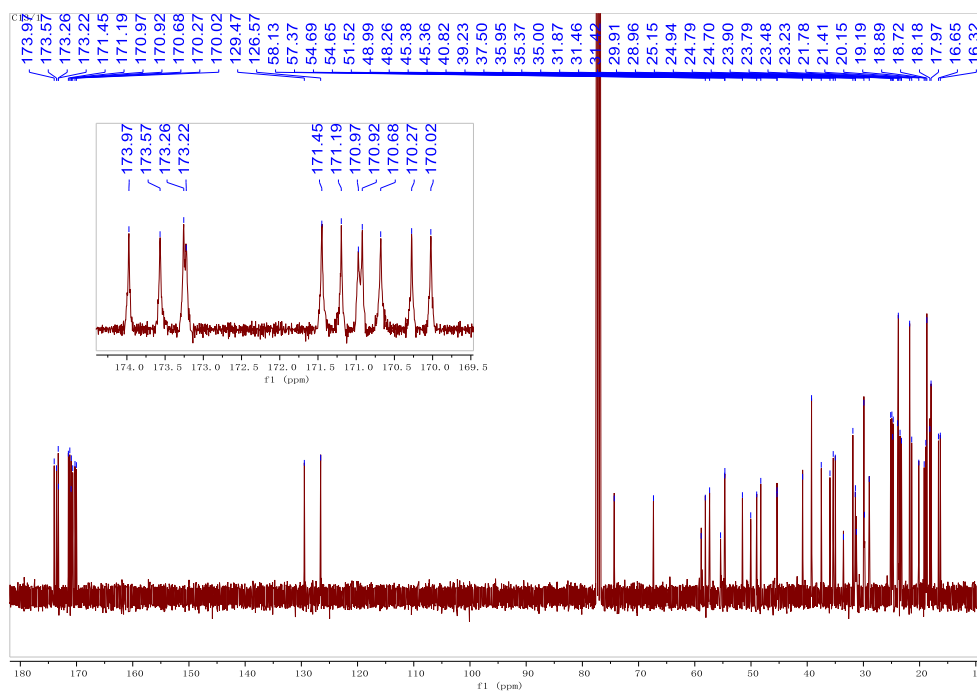

**Figure S10.** <sup>13</sup>C NMR of cyclosporin A (CsC).

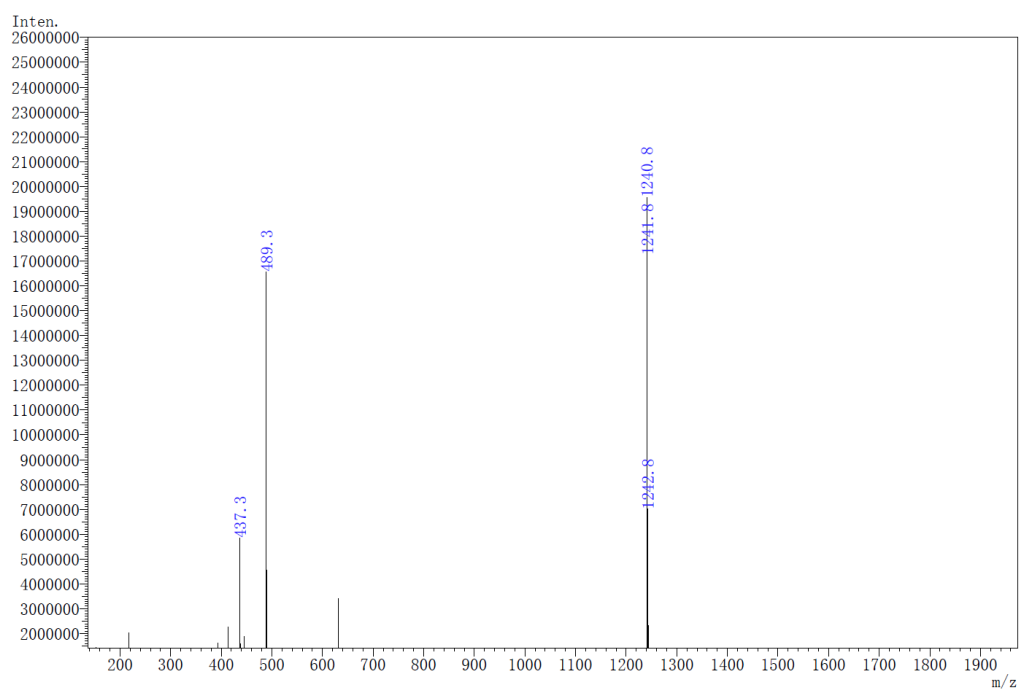

**Figure S11.** (+) ESI-MS of cyclosporin A (CsC).

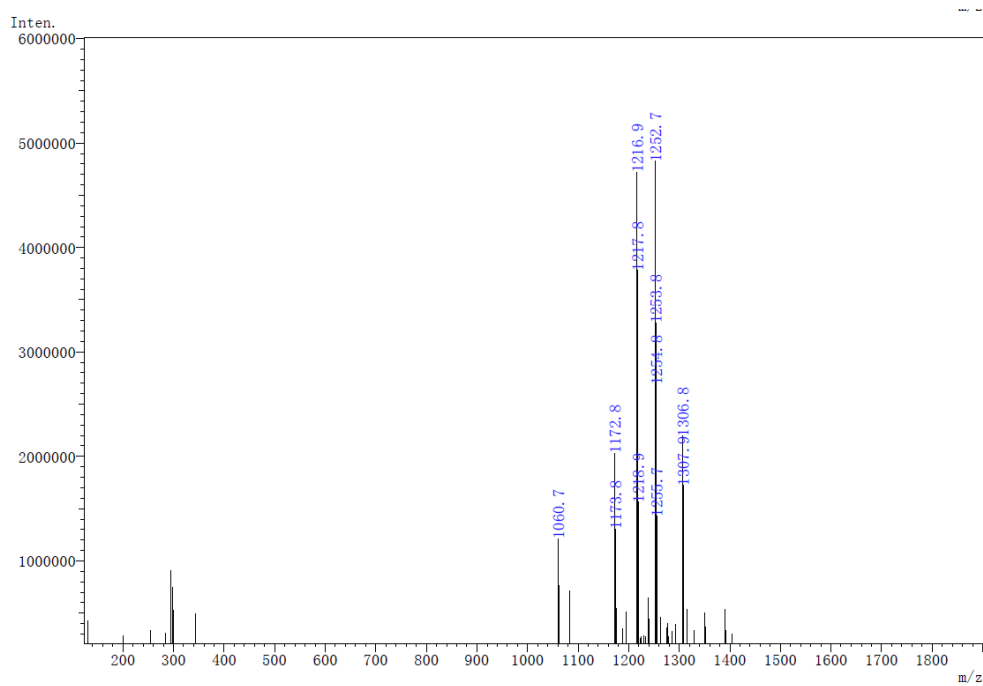

**Figure S12.** (–) ESI-MS of cyclosporin A (CsC).
